# Supplementary material for: State-of-the-art review: preventing child and youth pedestrian motor vehicle collisions: critical issues and future directions
Source: PubMed Central journal article supplement — Inj Prev. 2020 Nov 4;27(1):77–84. doi: 10.1136/injuryprev-2020-043829 (PMC7848053; doi:10.1136/injuryprev-2020-043829), 2020-11-04
Supplement: injuryprev-2020-043829supp001.pdf [file injuryprev-2020-043829supp001.pdf]

**TABLE 1 SEARCH TERMS FOR DATABASES BY DOMAIN**

| <b>Domain</b>            | <b>Concept #1 term(s)</b> | <b>Concept #2 term(s)</b>         | <b>Concept #3 term(s)</b>                                                                                                                                                                                                                                                            |
|--------------------------|---------------------------|-----------------------------------|--------------------------------------------------------------------------------------------------------------------------------------------------------------------------------------------------------------------------------------------------------------------------------------|
| <b>CHILD PEDESTRIAN</b>  | Pedestrian                | Child*<br>Youth<br>Teen, adolesc* | Socioeconomic Factors<br>Age<br>Sex or gender<br>Ethnicity<br>Culture<br>Employment, unemployment Education<br>Income<br>Deprivation, disparit*, social class, inequalit*<br>Single, lone Parent<br>Separation, divorce<br>Social Support, cohesion<br>Isolation, loneliness, lonely |
| <b>BUILT ENVIRONMENT</b> | Pedestrian                | Child*<br>Youth<br>Teen, adolesc* | Built environment<br>Urban<br>Rural<br>Road, street, lane<br>Traffic, volume of traffic<br>Traffic calming measures<br>Speed<br>School zone<br>Density<br>Lighting<br>Visibility                                                                                                     |
| <b>MOTOR VEHICLES</b>    | Pedestrian                | Vehicle<br>Car                    | Design<br>Size<br>Fleet<br>Type<br>Automated emergency braking (AEB)<br>Crash imminent braking (CIB)<br>Passenger car<br>Truck, heavy vehicle<br>Sport utility vehicle (SUV)<br>Autonomous vehicle<br>Smart car<br>Crash test<br>Self-driving car                                    |
| <b>DRIVERS</b>           | Pedestrian                | Drivers<br>Driving                | Speed, speeding<br>Impaired, drunk, drinking<br>Distraction<br>Behavior<br>Risk, risky, reckless<br>Road rage, aggressive                                                                                                                                                            |
