# Supplementary material for: State-of-the-art review: preventing child and youth pedestrian motor vehicle collisions: critical issues and future directions
Source: PubMed Central journal article supplement — Inj Prev. 2020 Nov 4;27(1):77–84. doi: 10.1136/injuryprev-2020-043829 (PMC7848053; doi:10.1136/injuryprev-2020-043829), 2020-11-04

**TABLE 2 NUMBER OF ARTICLES ACCORDING TO DATABASE SEARCHED****FIGURE 2: NUMBER OF ARTICLES ACCORDING TO DATABASES SEARCHED**

| Domains                          | Medline | Embase | TransPort | Dissertations | SafetyLit | Web of Science | CINHAL | ScoPus | PyscINFO |
|----------------------------------|---------|--------|-----------|---------------|-----------|----------------|--------|--------|----------|
| Child pedestrian characteristics | 216     | 341    | 30        | 1             | 24        | 136            | 168    | 44     | 67       |
| Built environment                | 212     | 311    | 34        | 2             | 15        | 123            | 164    | 20     | 54       |
| Driver behaviors                 | 261     | 425    | 500       | N/A           | 588       | 201            | 93     | 177    | 269      |
| Vehicle characteristics          | 274     | 313    | 1337      | 115           | 430       | 1058           | 87     | 1737   | 70       |

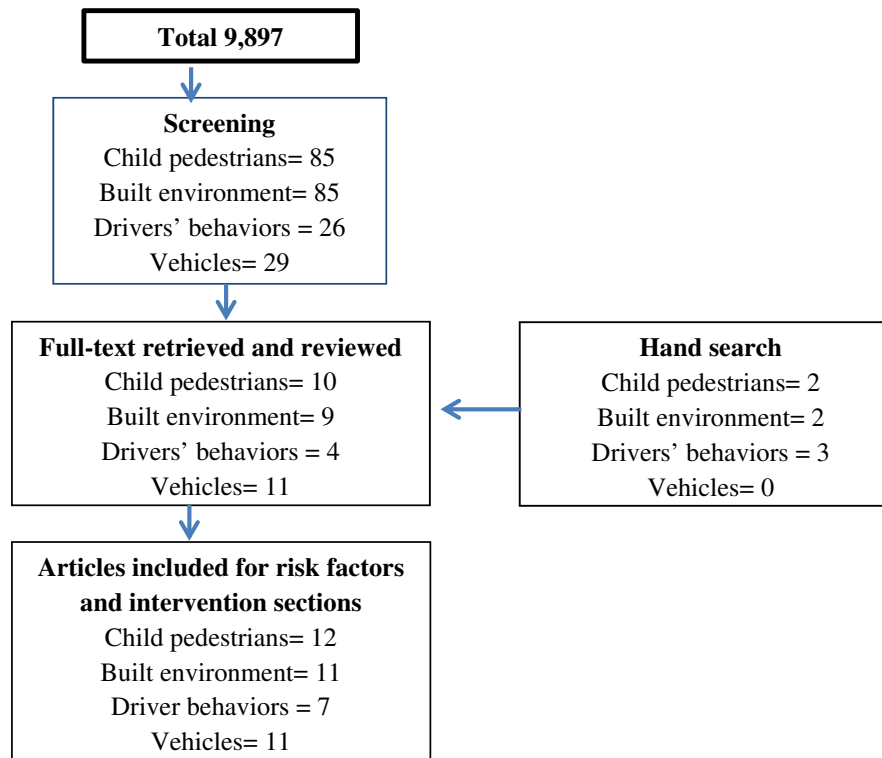

Supplement: injuryprev-2020-043829supp002.pdf [file injuryprev-2020-043829supp002.pdf]
