# Supplementary material for: State-of-the-art review: preventing child and youth pedestrian motor vehicle collisions: critical issues and future directions
Source: HighWire-hosted journal article supplement (doi:10.1136/injuryprev-2020-043829), 2020-11-04
Supplement: injuryprev-2020-043829supp003_data_supplement.pdf [file injuryprev-2020-043829supp003_data_supplement.pdf]

**TABLE 3: RISK FACTORS ADDRESSED IN THE REVIEWED LITERATURE**

| Author                                  | Article Type                        | Jurisdiction | Age range                      | Subtopic                   | Risk factor(s) associated with child PMVC                                                               |
|-----------------------------------------|-------------------------------------|--------------|--------------------------------|----------------------------|---------------------------------------------------------------------------------------------------------|
| <b>CHILD PEDESTRIAN CHARACTERISTICS</b> |                                     |              |                                |                            |                                                                                                         |
| Mannocci et al. (2019) <sup>35</sup>    | Systematic review and meta-analysis | Worldwide    | 10-19 years old                | Individual characteristics | Age (mixed findings according to age groups), male                                                      |
| Stoker et al. (2015) <sup>34</sup>      | Review article                      | Worldwide    | Children (undefined age range) | Individual characteristics | Younger age, male, low socio-economic status                                                            |
| Moller et al. (2013) <sup>36</sup>      | Systematic review                   | Worldwide    | 0-19 years old                 | Individual characteristics | Indigeneity (compared with non-Indigenous children)                                                     |
| Thomson et al. (2001) <sup>37</sup>     | Review report                       | Worldwide    | Children (undefined age range) | Individual characteristics | Ethnic minorities                                                                                       |
| Laflamme et al. (2000) <sup>38</sup>    | Review article                      | Worldwide    | Children (undefined age range) | Individual characteristics | Non-white inhabitants, family disruption, crowding, low family income, sole parenthood                  |
| Wazana et al. (1997) <sup>32</sup>      | Review article                      | Worldwide    | 2-18 years old                 | Individual characteristics | Age (mixed findings according to age groups), male, low family income, crowding, low parental education |
| Schieber et al. (1996) <sup>94</sup>    | Review article                      | Undefined    | Children (undefined age range) | Developmental stages       | Emerging developmental abilities at younger age                                                         |
| Schwebel et al. (2012) <sup>42</sup>    | Review article                      | Worldwide    | 4-12 years old                 | Behavioural factors        | Cognitive development, perceptual development, distraction, social influence (parent and peers)         |
| Granié (2009) <sup>43</sup>             | Observational study                 | France       | 12-16 years old                | Behavioural factors        | Sex-stereotype conformity (effect on internalizing traffic rules and risky behaviour)                   |

**BUILT ENVIRONMENT**

|                                      |                                     |                                                                                                 |                                |                                                                             |                                                                                                                                                                                                                                                                                                                                                                                                                                |
|--------------------------------------|-------------------------------------|-------------------------------------------------------------------------------------------------|--------------------------------|-----------------------------------------------------------------------------|--------------------------------------------------------------------------------------------------------------------------------------------------------------------------------------------------------------------------------------------------------------------------------------------------------------------------------------------------------------------------------------------------------------------------------|
| Mannocci et al. (2019) <sup>35</sup> | Systematic review and meta-analysis | Worldwide                                                                                       | 10-19 years old                | Built environment<br>Geographic location<br>Social and material environment | High population density, high moving traffic, rural areas, deprived socioeconomic areas                                                                                                                                                                                                                                                                                                                                        |
| Stoker et al. (2015) <sup>34</sup>   | Review article                      | Worldwide                                                                                       | Children (undefined age range) | Built environment<br>Geographic location                                    | High population density (dependant on vehicle miles traveled), urban areas (involvement in collisions), rural areas (injury and fatality rates), High traffic speed, wide street lanes, poor visibility, low-lighting, high traffic volume                                                                                                                                                                                     |
| Rothman et al. (2014) <sup>45</sup>  | Systematic review                   | Highly motorised countries<br>(Australia, Japan, New Zealand, North America and Western Europe) | 4-12 years old                 | Built environment                                                           | High road density/length, higher number of cross-walks, higher pedestrian volume, high population density, higher number of schools, land use mix and proximity of services                                                                                                                                                                                                                                                    |
| Kim et al. (2012) <sup>44</sup>      | Systematic review                   | Canada, USA                                                                                     | 0-17 years old                 | Geographic location                                                         | Rural vs urban areas (mixed findings)                                                                                                                                                                                                                                                                                                                                                                                          |
| Laflamme et al. (2000) <sup>38</sup> | Review article                      | Worldwide                                                                                       | Children (undefined age range) | Social and material environment<br>Built environment<br>Geographic location | Poorest income quintile or highly deprived neighborhoods, (based on income, unemployment, crowding, family problems, multifamily dwelling, subsidized housing)<br>High population density; fast moving traffic; absence of parks; higher distance from town center<br>High traffic density, high vehicle speed, absence of play areas, multi-lane roads, absence of traffic calming measures (speed bumps, signage, narrowing) |
| Dimaggio et al. (2012) <sup>95</sup> | Systematic review and meta-analysis | Worldwide                                                                                       | 0-15 years old                 | Built environment<br>Social environment                                     | High volume of traffic, higher speed limits, multi-lane roads, predominance of multi dwelling apartments                                                                                                                                                                                                                                                                                                                       |
| Wazana et al. (1997) <sup>32</sup>   | Review article                      | Worldwide                                                                                       | 2-18 years old                 | Built environment<br>Social and material environment                        |                                                                                                                                                                                                                                                                                                                                                                                                                                |

---

**DRIVER BEHAVIORS**


---

|                                          |                                          |                          |                                        |                              |                                                                                                                                                                                                    |
|------------------------------------------|------------------------------------------|--------------------------|----------------------------------------|------------------------------|----------------------------------------------------------------------------------------------------------------------------------------------------------------------------------------------------|
| Fridman et al. (2019) <sup>50</sup>      | Modified quasi-induced exposure approach | Calgary, Alberta, Canada | Child pedestrian (undefined age range) | Impairment                   | 16-24 years old drivers, driving in the evening (18:00-24:00); no seat-belt use; child passenger in the car at the time of the collision, and impairment (substance use, fatigued, medical defect) |
| Stavrinos et al. (2018) <sup>51,87</sup> | Systematic Review and Meta-Analysis      | Worldwide                | 0-24 years old                         | Distraction                  | Teen drivers, mobile technology use: interacting with phone or talking on the phone (associated with more risk in general)                                                                         |
| Rothman et al. (2017) <sup>51</sup>      | Cross-sectional observational study      | Toronto, Ontario, Canada | Junior kindergarten to grade 6         | Dangerous Driving Behaviours | Double parking, drop-offs on the opposite side of the school                                                                                                                                       |
| Dultz et al. (2013) <sup>49</sup>        | Review article                           | Worldwide                | All ages                               | Impairment                   | Alcohol use                                                                                                                                                                                        |
| Retting et al. (2003)                    | Review article                           | Worldwide                | All ages                               | Speed                        | High vehicle travel speeds                                                                                                                                                                         |
| Wazana et al. (1997)                     | Review article                           | Worldwide                | 2-18 years old                         | Speed                        | High vehicle travel speeds                                                                                                                                                                         |

---

---

**MOTOR VEHICLES CHARACTERISTICS (ALL AGES)**


---

|                                       |                                     |           |                |                                        |                                                                                                                                                                                                         |
|---------------------------------------|-------------------------------------|-----------|----------------|----------------------------------------|---------------------------------------------------------------------------------------------------------------------------------------------------------------------------------------------------------|
| Beza et al. (2019) <sup>68</sup>      | Review article                      | Worldwide | All ages       | Connected and automated vehicles (CAV) | Reduction of human driver errors (associated to a reduction in collisions in general)<br>Pedestrian interaction with CAVs and pedestrian safety (mixed findings due to unknown future mobility pattern) |
| Elliott et al. (2019) <sup>66</sup>   | Review article                      | Worldwide | All ages       | Connected and automated vehicles (CAV) | Reduction of human driver errors (associated to a reduction in collisions in general)<br>Inclement weather, low light (negative association to sensors detection capabilities)                          |
| Stanciu et al. (2018) <sup>67</sup>   | Review article                      | Worldwide | All ages       | Connected and automated vehicles (CAV) | Comprehension of messages during communication between a driver and a pedestrian is influenced by several factors including culture, context, and experience.                                           |
| Desapriya et al. (2010) <sup>63</sup> | Systematic Review and Meta-Analysis | Worldwide | All ages       | Light truck vehicles (LTV)             | LTV (positive association to PMVC)                                                                                                                                                                      |
| Paulozzi (2005) <sup>65</sup>         | Fatality rates by vehicle type      | USA       | 0-14 years old | Vehicle type                           | Buses, motorcycles (positive association to child PMVC)                                                                                                                                                 |

---
