# Supplementary material for: State-of-the-art review: preventing child and youth pedestrian motor vehicle collisions: critical issues and future directions
Source: PubMed Central journal article supplement — Inj Prev. 2020 Nov 4;27(1):77–84. doi: 10.1136/injuryprev-2020-043829 (PMC7848053; doi:10.1136/injuryprev-2020-043829), 2020-11-04
Supplement: injuryprev-2020-043829supp004.pdf [file injuryprev-2020-043829supp004.pdf]

**TABLE 4: INTERVENTIONS ADDRESSED IN THE REVIEWED LITERATURE**

| <b>Author</b>                           | <b>Article Type</b>                 | <b>Jurisdiction</b> | <b>Age range</b> | <b>Subtopic</b>                           | <b>Intervention associated with outcomes (child behavioral changes, PMVC, others)</b>                                                                                                                        |
|-----------------------------------------|-------------------------------------|---------------------|------------------|-------------------------------------------|--------------------------------------------------------------------------------------------------------------------------------------------------------------------------------------------------------------|
| <b>CHILD PEDESTRIAN CHARACTERISTICS</b> |                                     |                     |                  |                                           |                                                                                                                                                                                                              |
| Mannocci et al. (2019) <sup>35</sup>    | Systematic review and meta-analysis | Worldwide           | 10-19 years old  | Training- children's knowledge, behaviors | Community-based programs (mixed findings on child behavioral changes); effectiveness proportional to the complexity of the strategies implemented, resources available, commitment of individuals, etc.      |
| Schwebel et al. (2014) <sup>40</sup>    | Systematic review and meta-analysis | Worldwide           | 3-11 years old   | Training-children's behaviors             | Individualized and small-group training (positive association with child behavioral changes)<br>Virtual reality, boardgames, classroom training, video training (mixed findings on child behavioral changes) |
| Dowswell et al. (2002) <sup>42</sup>    | Systematic Review                   | Low-income areas    | 0-14 years old   | Training- children's behaviors            | Practical roadside pedestrian training (positive association to child behavioral changes)                                                                                                                    |

**BUILT ENVIRONMENT**

|                                     |                                                 |                                  |                |                               |                                                                                                                                                                                                                                                                                                                                                              |
|-------------------------------------|-------------------------------------------------|----------------------------------|----------------|-------------------------------|--------------------------------------------------------------------------------------------------------------------------------------------------------------------------------------------------------------------------------------------------------------------------------------------------------------------------------------------------------------|
| Staton et al. (2016) <sup>47</sup>  | Systematic review and qualitative meta-analysis | Low- and Middle-Income countries | All ages       | Speed control                 | Speed bumps (associated to a reduction in PMVC)                                                                                                                                                                                                                                                                                                              |
| Cairns et al. (2015) <sup>48</sup>  | Systematic review                               | Worldwide                        | All ages       | Speed control                 | 20 mph traffic speed reduction zones (associated to a reduction in PMVC)<br>Safe community interventions: legislative action, construction of separate pedestrian and cyclist roads, enforcement of lowered speed limits, mass media campaigns, targeted education of children and targeted counselling of parents (associated to a reduction in child PMVC) |
| Turner et al. (2004) <sup>46</sup>  | Systematic review                               | Worldwide                        | 0-14 years old | Community-based interventions | Traffic calming (associated with a reduction in PMVC)                                                                                                                                                                                                                                                                                                        |
| Retting et al. (2003) <sup>96</sup> | Review article                                  | Worldwide                        | All ages       | Speed                         | Traffic calming (associated with a reduction in PMVC)                                                                                                                                                                                                                                                                                                        |

**DRIVERS'S BEHAVIORS**

|                                       |                             |         |          |       |                                                                                                                                                |
|---------------------------------------|-----------------------------|---------|----------|-------|------------------------------------------------------------------------------------------------------------------------------------------------|
| Quistberg et al. (2018) <sup>67</sup> | Before-and-after evaluation | Seattle | All ages | Speed | Automated enforcement cameras near schools (associated to a decrease in speed violation rates, maximum violation speed and mean hourly speeds) |
|---------------------------------------|-----------------------------|---------|----------|-------|------------------------------------------------------------------------------------------------------------------------------------------------|

**MOTOR VEHICLES CHARACTERISTICS (ALL AGES)**

|                                        |                                    |           |          |                              |                                                                                                                                                                               |
|----------------------------------------|------------------------------------|-----------|----------|------------------------------|-------------------------------------------------------------------------------------------------------------------------------------------------------------------------------|
| Haus et al. (2019) <sup>72</sup>       | Modelling (injury risk)            | U.S.A.    | All ages | Vehicle design               | Automated emergency braking system (associated to a reduction in fatality and injury risk)                                                                                    |
| Edwards et al. (2015) <sup>73</sup>    | Modelling (cost/benefit)           | Europe    | All ages | Vehicle design               | Automated emergency braking system and passive safety such as A-pillar airbag (associated to a reduction in injury cost)                                                      |
| Hu & Klinich (2015) <sup>64</sup>      | Review report                      | Worldwide | All ages | Vehicle design               | Deployable passive safety design: pop-up hoods, windshield airbags, and active safety designs: brake-assist and autonomous-braking system (associated to a reduction in PMVC) |
| Gupta et al. (2015) <sup>71</sup>      | Simulation study (numerical model) | n/a       | All ages | Vehicle design               | Primary and secondary pedestrian head impact location, therefore injury severity (associated to the front end design type)                                                    |
| Strandroth et al. (2014) <sup>74</sup> | Crash tests                        | Europe    | All ages | Vehicle design and standards | Front end Euro NCAP standards (poor rating associated to pedestrian injury severity)                                                                                          |
| Van Kampen (1991) <sup>70</sup>        | Review article (report)            | Worldwide | All ages | Vehicle design               | Front end design safety standards (associated to a reduction in PMVC)                                                                                                         |
